# Supplementary material for: Dynamics of mRNA fate during light stress and recovery: from transcription to stability and translation
Source: PubMed Central journal article supplement (PMC10952913; doi:10.1111/tpj.16531), 2023-11-10
Supplement: TPJ-117-818-s003.pdf [file TPJ-117-818-s003.pdf]

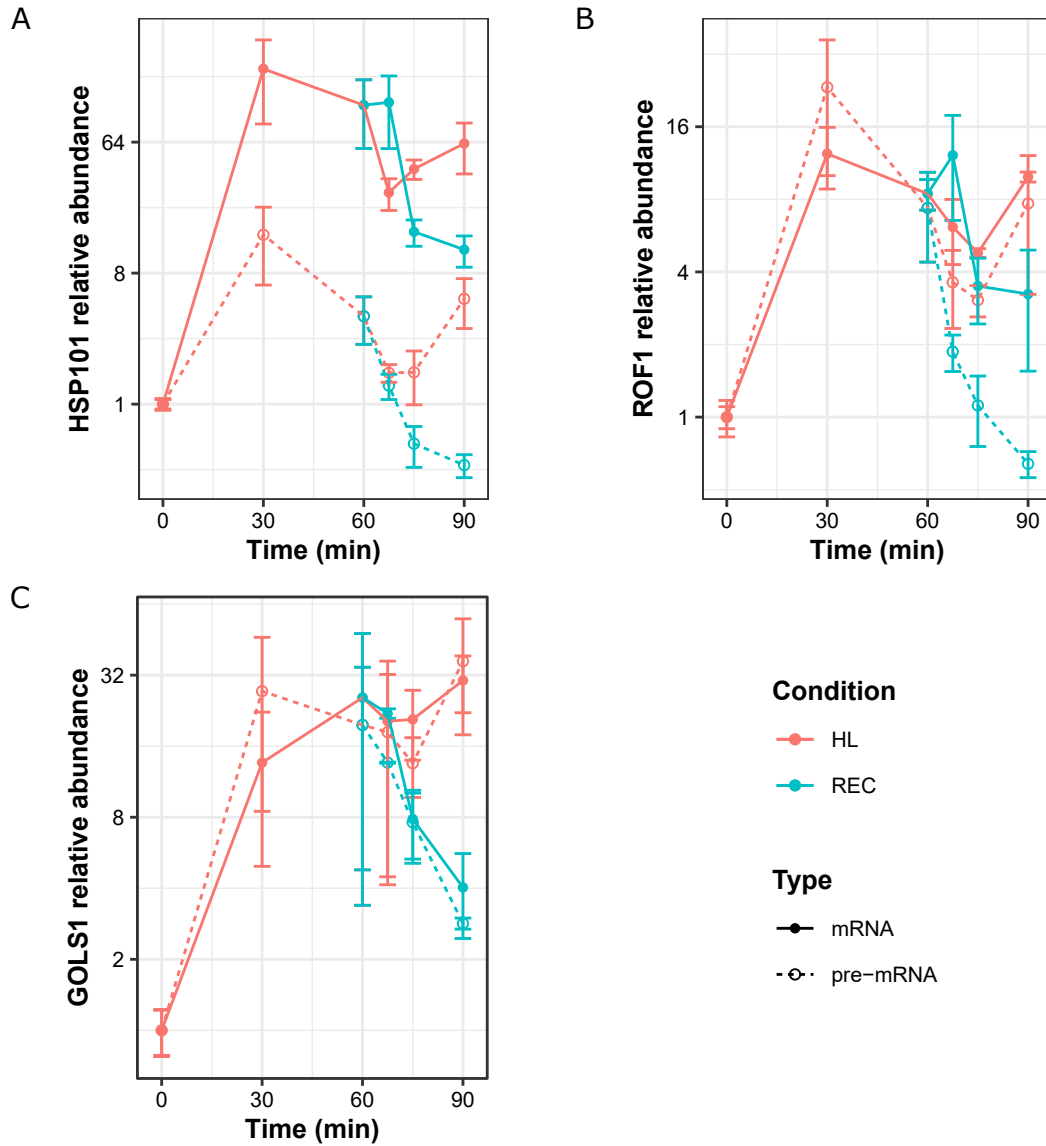

**Figure S1. Pre-mRNA levels decrease more rapidly during recovery than mRNA**  
 (A-C) Profiles of pre-mRNA and mRNA for *HSP101*, *ROF1*, and *GOL51* during HL and REC. Data is presented as relative abundance compared to time 0. Points denote means, error bars denote standard error of the mean (n=3).
