# Supplementary material for: Dynamics of mRNA fate during light stress and recovery: from transcription to stability and translation
Source: PubMed Central journal article supplement (PMC10952913; doi:10.1111/tpj.16531), 2023-11-10
Supplement: TPJ-117-818-s005.pdf [file TPJ-117-818-s005.pdf]

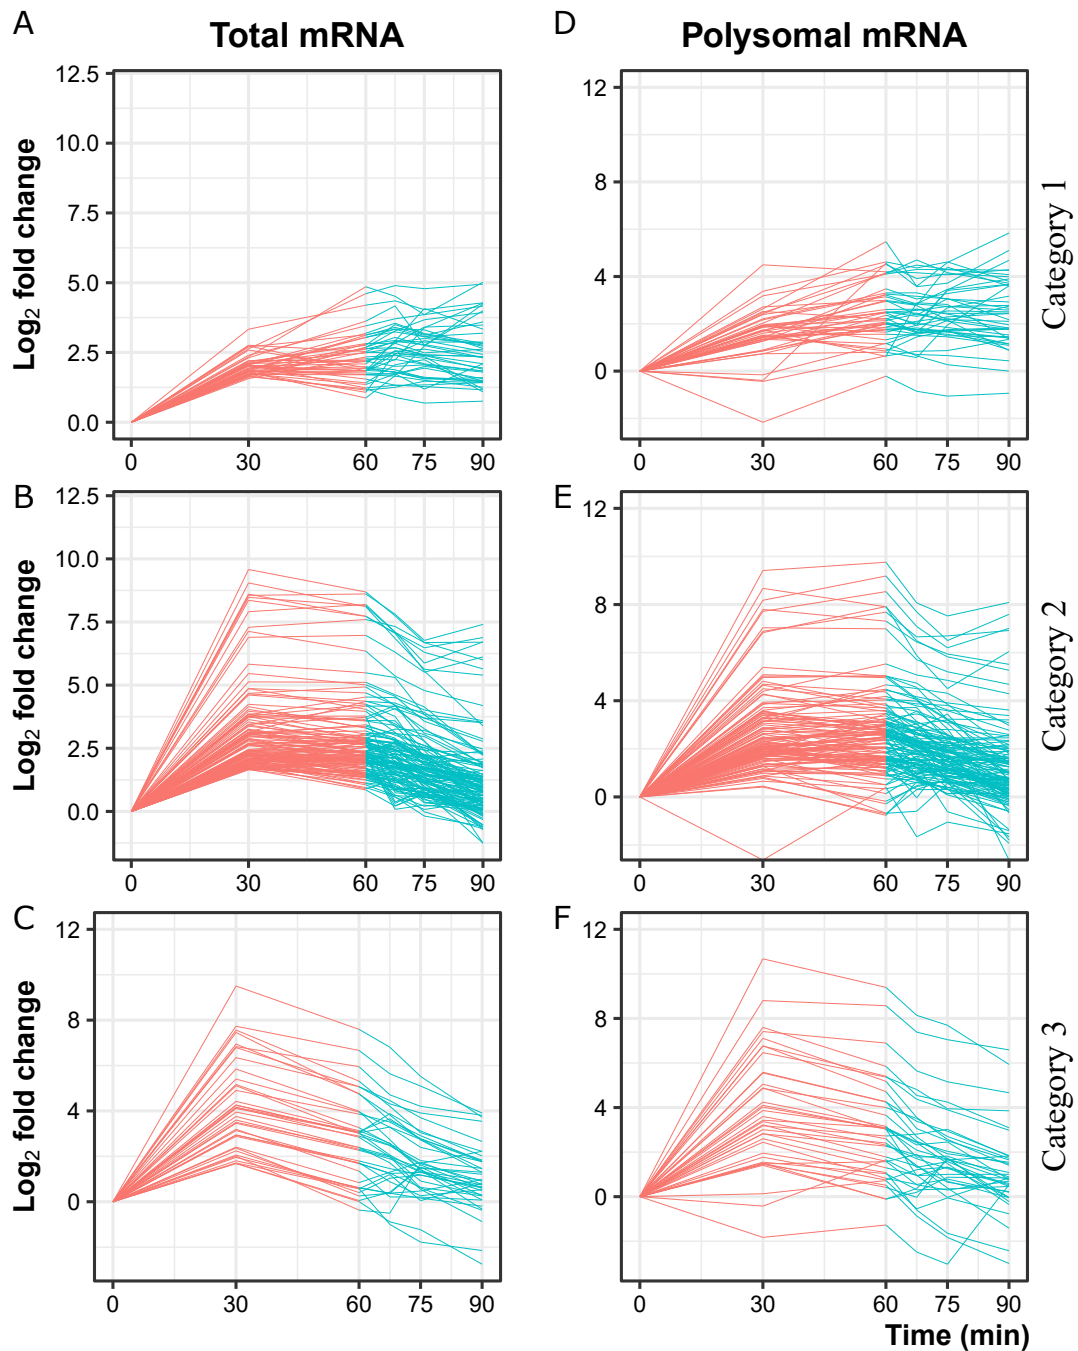

**Figure S7. Expression profiles of light-induced total and polysome-associated mRNAs during light stress and recovery in Arabidopsis**

(A-C) Genes induced by HL ( $FC > 3$  after 30 mins) were categorised by their expression profiles in the total mRNA fraction. Category 1 genes remained elevated during REC. Category 2 genes were significantly down-regulated during REC. Category 3 genes were significantly down-regulated between 30 and 60 minutes HL ( $n=3$ ).

(D-F) The corresponding changes in polysome-bound mRNA are displayed ( $n=2$ ).

Lines represent mean relative abundance over time during HL (red) and REC (blue).
