# Supplementary material for: Dynamics of mRNA fate during light stress and recovery: from transcription to stability and translation
Source: PubMed Central journal article supplement (PMC10952913; doi:10.1111/tpj.16531), 2023-11-10
Supplement: TPJ-117-818-s007.pdf [file TPJ-117-818-s007.pdf]

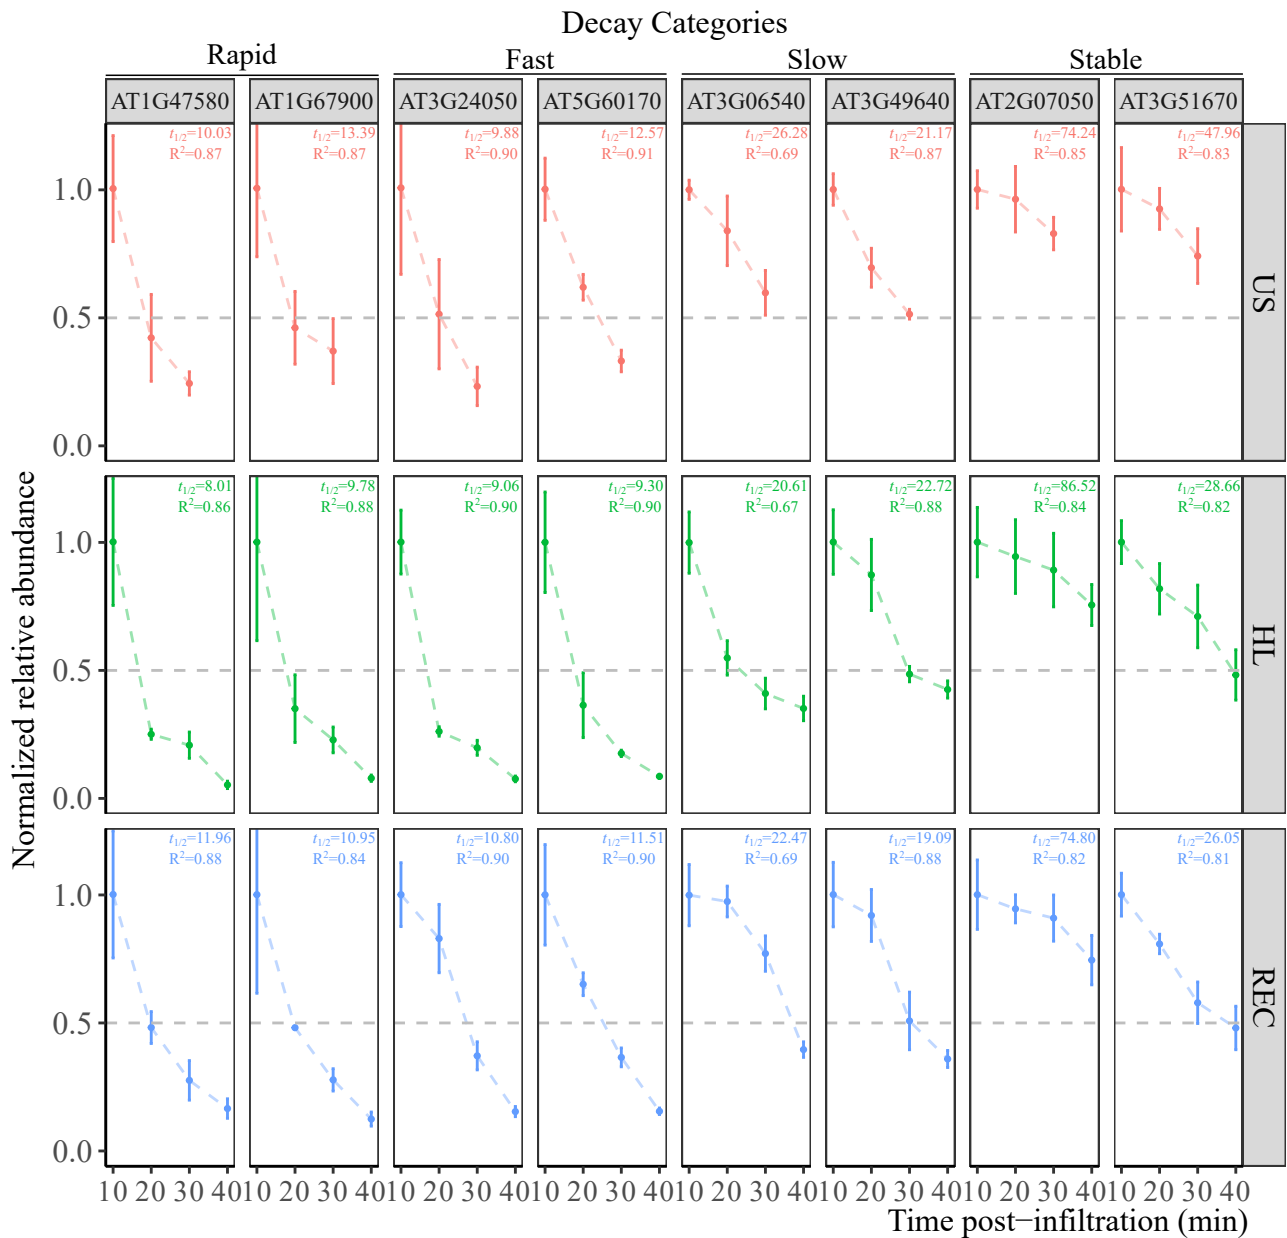

**Figure S3. Representative RNA decay curves**

Plots represent changes in normalized relative abundance for two example genes from each pattern of decay observed: rapid, fast, slow, stable. Points represent means, error bars represent standard error (n=3-4). Linear mixed-effects modelling was used to determine half-life values and the R-squared obtained for each model is shown.
